# Supplementary material for: A diabolo-shaped Dy9 cluster: synthesis, crystal structure and magnetic properties
Source: Royal Society of Chemistry journal article supplement (doi:10.1039/c1dt10450k), 2011-01-01
Supplement: c1dt10450k.pdf [file c1dt10450k.pdf]

## Supporting Information to the paper

### A diabolo-shaped Dy<sub>9</sub> cluster: synthesis, crystal structure and magnetic properties

Xuebin Xu, Lang Zhao, Gong-Feng Xu, Yun-Nan Guo, Jinkui Tang\* and Zhiliang Liu\*

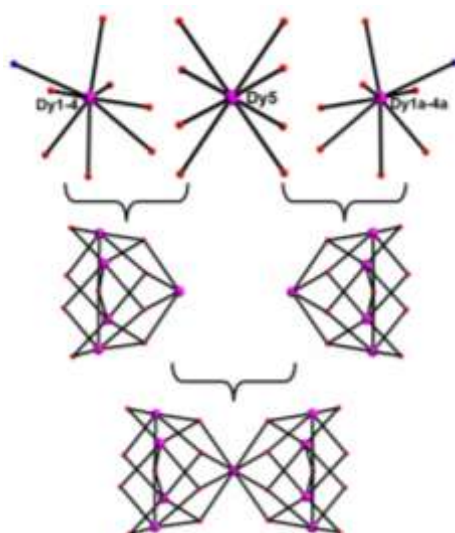

**Fig. S1** Coordination environments of the two types of Dy<sup>III</sup> ions, i.e. Dy1-4, and Dy5 and representation of the formation of diabolo-shaped molecule by coupling two square pyramidal pentanuclear units via the apical metal center (Dy5).

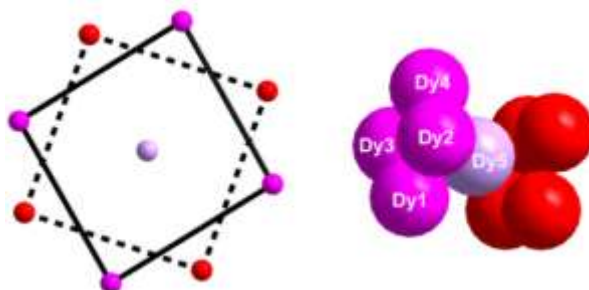

**Fig. S2** Representation of the square antiprism formed by the nine dysprosium ions (left) and illustration of the nonanuclear Dy<sup>III</sup> cluster in space-filling mode (right).

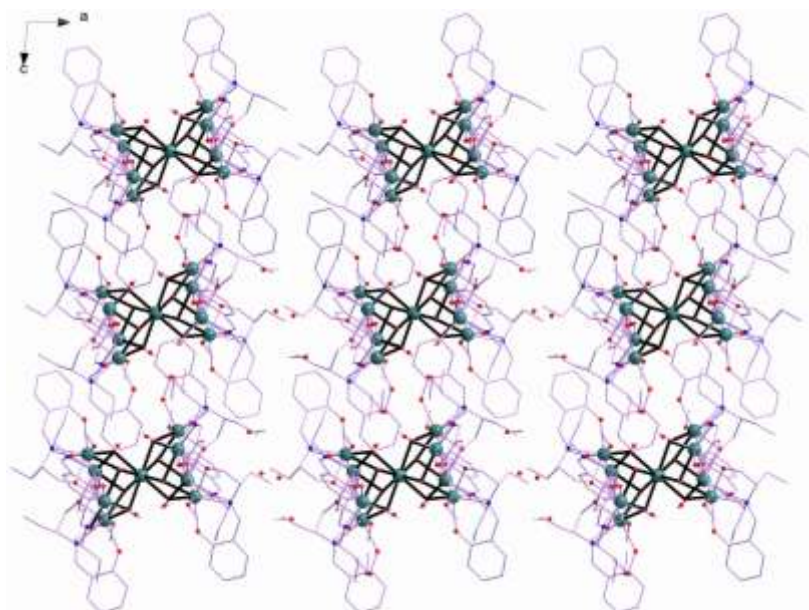

**Fig. S3** Crystal packing of compound  $\text{Dy}_9$  along the  $b$  axis.
